# Supplementary material for: Supercritical synthesis in combination with a spray process for 3D porous microsphere lithium iron phosphate
Source: Royal Society of Chemistry journal article supplement (doi:10.1039/c3ce42264j), 2014-01-01
Supplement: c3ce42264j1.pdf [file c3ce42264j1.pdf]

## Supplementary Information

# Supercritical synthesis in combination with spray process for 3D porous microsphere lithium iron phosphate

Jae-Kwang Kim

Interdisciplinary School of Green Energy, Ulsan National Institute of Science and Technology (UNIST),  
689-798 Ulsan, Korea and Department of Applied Physics, Chalmers University of Technology, 412 96  
Göteborg, Sweden. E-mail: [jaekwang@unist.ac.kr](mailto:jaekwang@unist.ac.kr)

\* Corresponding author: [jaekwang@chalmers.se](mailto:jaekwang@chalmers.se) (J.-K. Kim)

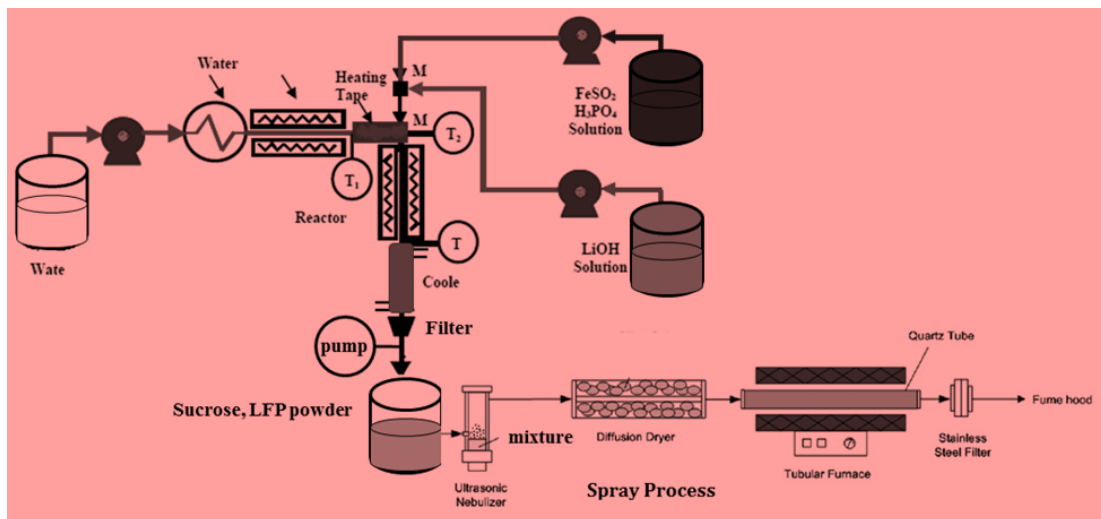

**Figure S1.** Supercritical synthesis in combination with spray process for microsphere  $\text{LiFePO}_4$ .
